# Supplementary material
Source: PubMed Central journal article supplement (PMC3256884)
Supplement: supp_M111.291294_jbc.M111.291294-1.pdf [file supp_M111.291294_jbc.M111.291294-1.pdf]

**Supplemental Table 1. List of antibodies used in this study**

| <b>Antigen</b>       | <b>Origin</b>  | <b>Source</b>     | <b>Dilution</b> |
|----------------------|----------------|-------------------|-----------------|
| Akt pSer473          | Cell Signaling | Rabbit polyclonal | 1/1000          |
| CB <sub>2</sub>      | Abr            | Rabbit polyclonal | 1/500           |
| SGK1 pThr422         | Abcam          | Rabbit polyclonal | 1/500           |
| Nestin               | Chemicon       | Mouse monoclonal  | 1/200           |
| BrdU                 | Abcam          | Rat               | 1/500           |
| Ki67                 | Neomarkers     | Rabbit polyclonal | 1/500           |
| 4E-BP1 pThr37/46     | Cell Signaling | Mouse monoclonal  | 1/500           |
| pERK pThr202/pTyr204 | Cell Signaling | Rabbit polyclonal | 1/500           |
| p27Kip1 pThr157      | R&D Systems    | Rabbit polyclonal | 1/500           |
| p70S6K pThr389       | Cell Signaling | Mouse monoclonal  | 1/500           |
| S6 pSer235/236       | Cell Signaling | Rabbit polyclonal | 1/500           |
| $\alpha$ -Tubulin    | Sigma-Aldrich  | Rabbit polyclonal | 1:4000          |

**Supplemental Table 2. List of oligonucleotides used in this study**

| <b>mRNA</b>      | <b>Sense</b>              | <b>Antisense</b>           |
|------------------|---------------------------|----------------------------|
| CB <sub>1</sub>  | TCT CTG GAA GGC TCA CAG   | TGT CTG TGGA CAC AGA CAT G |
| CB <sub>2</sub>  | GGATGCCGGGAGACAGAAGTGA    | CCCATGAGCGGCAGGTAAGAAAT    |
| GPR55            | GTGGTCTCCTTTCTCCCAGTG     | TTAGCCCCTGGAGACCATGGTATCC  |
| Nestin           | CTGGGSGGAAAGTGTGAAGG      | GGTAGAGGCCCAAGGGAGTAGAGT   |
| $\beta$ -Tubulin | CTGCTGTTCTTACTCTGGATG     | TAGTGGAGAACACAGACGAGA      |
| GAPDH            | GGGAAGCTCACTGGCATGGCCTTCC | CATGTGGGCCATGAGGTCCACCAC   |
