# Supplementary material
Source: PubMed Central journal article supplement (PMC3256884)
Supplement: supp_M111.291294_jbc.M111.291294-2.pdf [file supp_M111.291294_jbc.M111.291294-2.pdf]

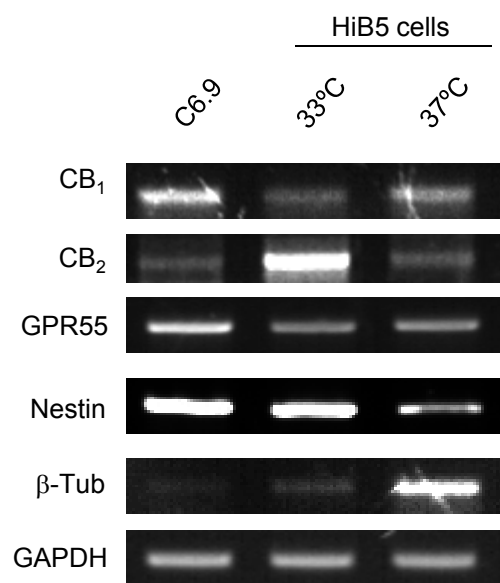

**Suppl. Figure 1**

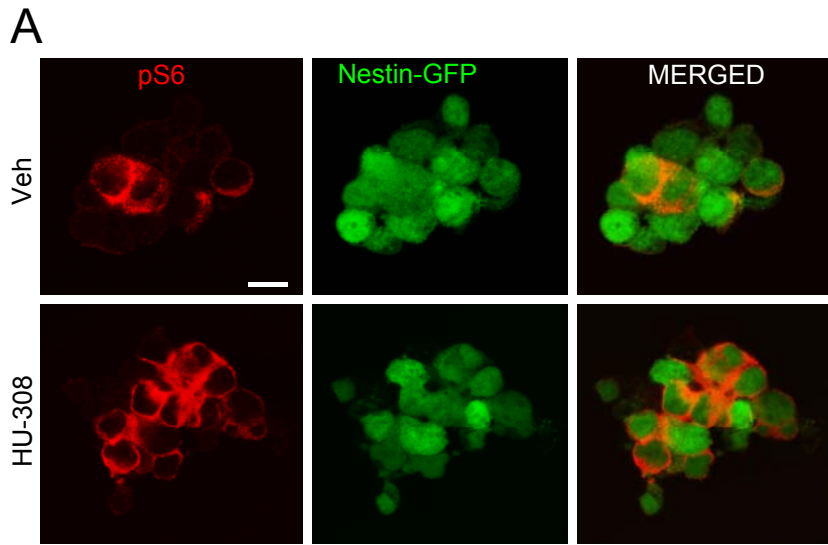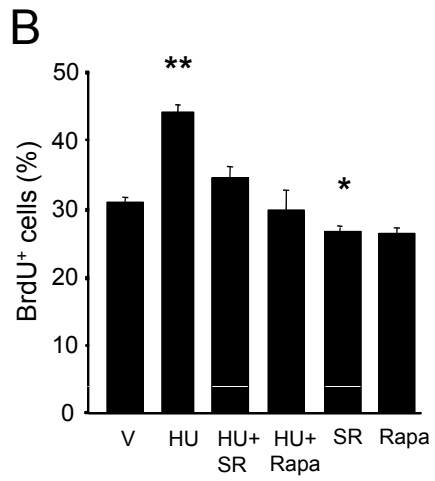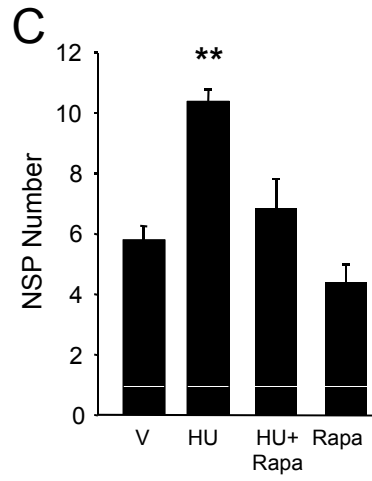

**SUPPL. FIGURE 2**

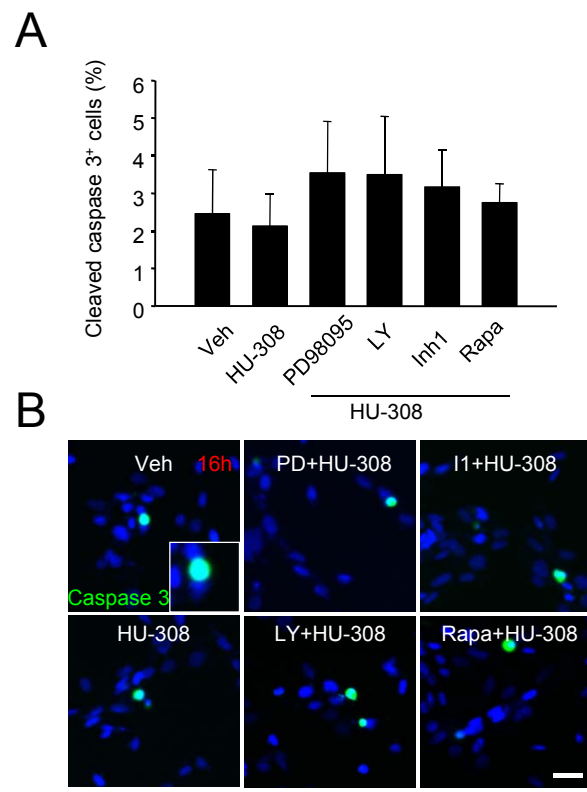

**SUPPL. FIGURE 3**

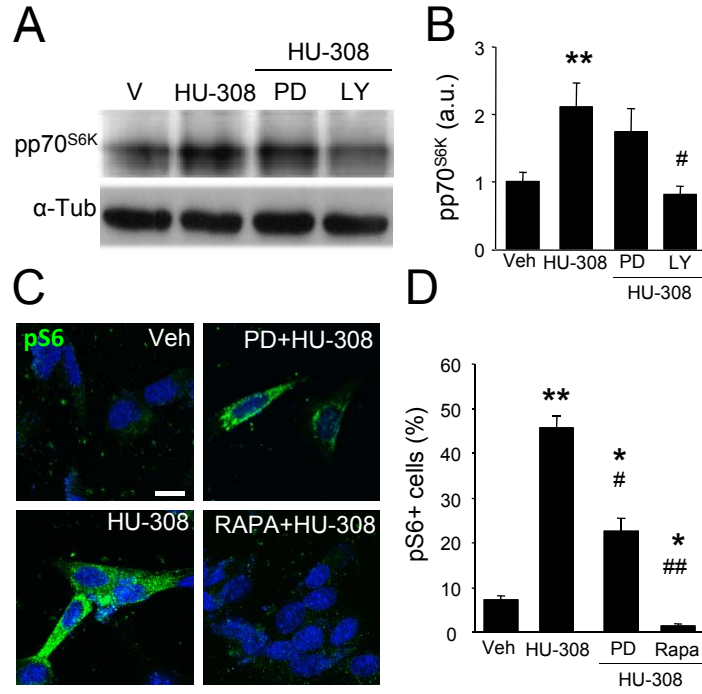

**SUPPL. FIGURE 4**

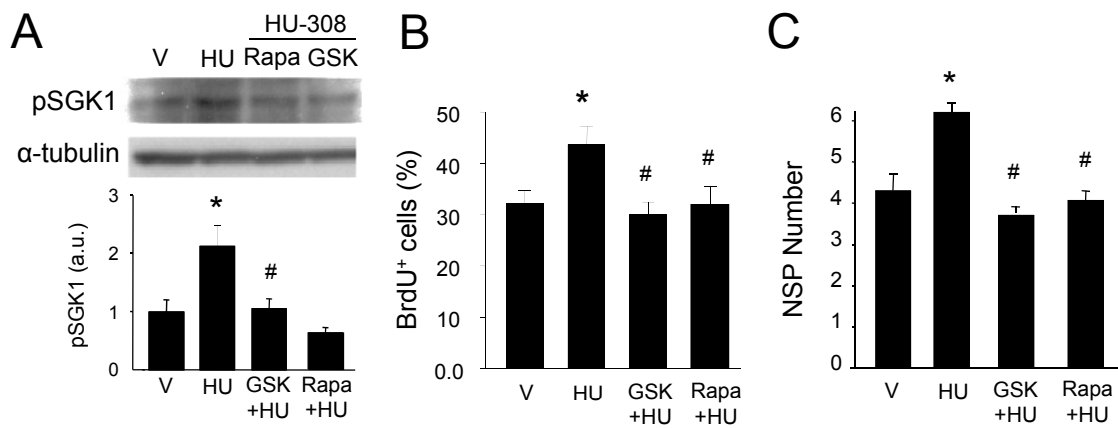

**SUPPL. FIGURE 5**

**SUPPLEMENTAL Fig. 1. HiB5 neural progenitor cells express cannabinoid receptors.**

Reverse transcription-PCR analysis of CB<sub>1</sub>, CB<sub>2</sub> and GPR55 receptors was performed in HiB5 cells grown at proliferating (33° C) and differentiating conditions (3 days in vitro at 37° C) using the C6.9 clone of the glioma C6 cell line as control. Nestin and β-tubulin III transcripts were analyzed to monitor cell differentiation. Loading control was performed with GAPDH probe.

**SUPPLEMENTAL Fig. 2. CB<sub>2</sub> cannabinoid receptors signal through the PI3K/Akt /mTORC1 axis on neural progenitors and neurospheres.**

A, Immunofluorescence analysis of nestin-GFP neural progenitors with the anti-phospho-S6 antibody after HU-308 treatment for 30 min. B, Embryonic (E14.5) neural progenitor proliferation was determined by quantification of BrdU<sup>+</sup> cells after 16 h of incubation with HU-308 as above, alone or in the presence of SR144528 and rapamycin. The fraction of BrdU<sup>+</sup> cells is referred to the total cell number as determined by Hoechst 33342 counterstaining. Results correspond to 4 independent experiments. C, Neurosphere generation was determined in clonal-density progenitor cultures after 3 days of incubation with HU-308 in the absence or presence of rapamycin. Results correspond to 4 independent experiments. Scale bars, 10 μm. \*, p <0.05; \*\*, p <0.01 versus vehicle-treated cells.

**SUPPLEMENTAL Fig. 3. Lack of cell death in HiB5 progenitor cultures.** A, HiB5 cells were treated with HU-308 (50 nM) for 16 h in the absence or presence of PD-8059 (10 μM), LY-294,002 (5 μM), Akt Inhibitor 1 (5 μM) and rapamycin (50 nM) and cell death was quantified after immunofluorescence with a selective antibody against active caspase 3. Total cells were counterstained with Hoechst 33342. B, Representative immunofluorescence images are shown. Scale bar, 40 μm.

**SUPPLEMENTAL Fig 4. ERK does not play a major role in HU-308-induced mTORC1 activation in HiB5 cells.**

A and B, HiB5 cells were incubated with HU-308 (50 nM) for 30 min in the absence or presence of PD98059 (10 μM) and LY-294,002 (5 μM). Levels of phospho-p70S6K were quantified and referred to loading control performed with anti-α-tubulin antibody. C and D, The number of phospho-S6<sup>+</sup> HiB5 cells was quantified after incubation with HU-308 (50 nM) for 30 min in the absence or presence of PD98059 (10 μM) and rapamycin (Rapa; 50 nM) and immunofluorescence. Phospho-S6<sup>+</sup> cells were normalized to total cell number as identified by Hoechst 33342 counterstaining. Representative images are shown for each condition. Scale bar, 10 μm. \*, p <0.05; \*\*, p <0.01 versus vehicle-treated cells; # p <0.05; ## p <0.01 versus HU-308-treated cells.

**SUPPLEMENTAL Fig. 5. SGK1 participates in CB<sub>2</sub> receptor/mTORC1-mediated HiB5 cell progenitor proliferation.**

A, HiB5 cells were treated with HU-308 alone or in the presence of rapamycin (Rapa; 50 nM) and GSK-650394 (75 nM) and Western blot and immunofluorescence analyses were performed. Levels of phospho-SGK1 were quantified and referred to loading control performed with anti-α-tubulin antibody and given in arbitrary units (a.u.). Representative luminograms and immunofluorescence images are shown. B, HiB5 cells were treated as above for 16 h and BrdU incorporation was quantified. C, Neurosphere (NSP) generation was quantified in clonal-density conditions and the number of NSPs determined after 3 days of HU-308 treatment alone or in the presence of GSK-650394 and rapamycin (as above). Scale bars, B and D, 50 and 10 μm, respectively. \*, p <0.05, versus vehicle-treated cells; # p <0.05, versus HU-308-treated cells.
